# Supplementary material
Source: PubMed Central journal article supplement (PMC2921769)
Supplement: NIHMS225836-supplement-supplement_1.pdf [file NIHMS225836-supplement-supplement_1.pdf]

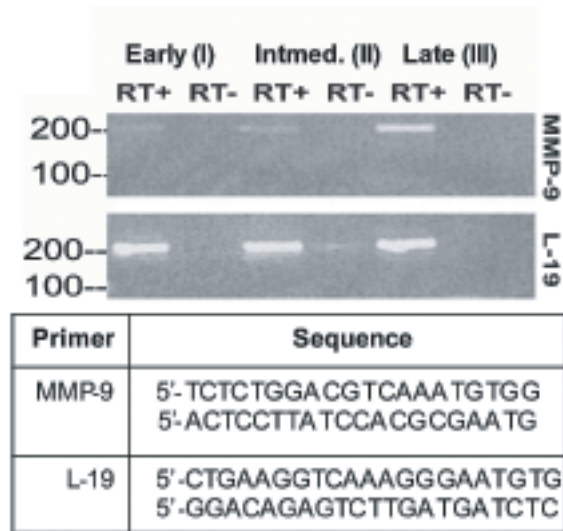

**Supplemental Figure 1.** RT-PCR detection of MMP-9 and L-19 in neuroblastoma tumors as a function of group. RT + = reverse transcriptase positive; RT - = reverse transcriptase negative. Sequences of the MMP-9 and L-19 primers used in the RT-PCR reactions are shown below the figure.

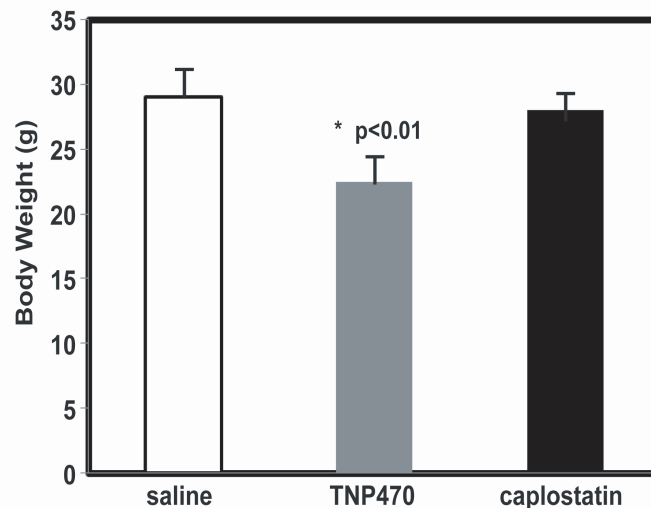

**Supplemental Figure 2.** Weight loss in animals treated with TNP-470. Average weight of animal cohorts treated in Fig. 4 was 28g +/- 3g in the DMSO treated controls, 21g +/- 2g (>15% of total body weight loss) in the TNP-470 cohort ( $p < 0.01$ ), and was not significantly different in the caplostatin treated cohort. Data represent mean +/- s.e. (n = 8 mice per group).

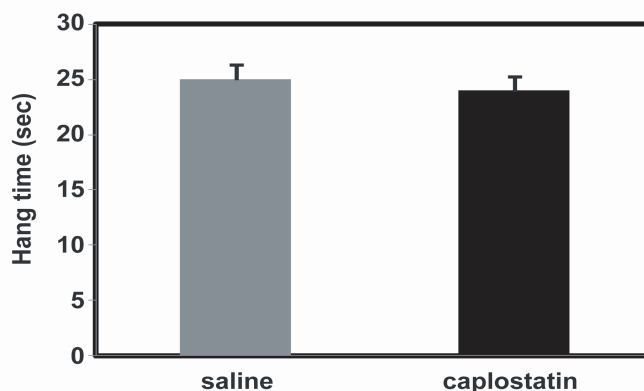

**Supplemental Figure 3.** Rotarod testing of caplostatin treated animals. To assess neurotoxicity in animals treated with caplostatin, rotarod testing was performed, prior to and after two weeks of therapy. No significant difference in performance was detected between caplostatin treated and saline treated controls ( $p < 0.05$ ). Data represent mean +/- s.e. (n = 8 mice per group).
